# Supplementary material
Source: PubMed Central journal article supplement (PMC2674254)
Supplement: dev.028472_4.pdf [file dev.028472_4.pdf]

**Table S1. Developmental arrest of *mig-6* class-s alleles**

| Genotype*    | Average brood size | % Embryonic arrest | % L1-L2 arrest | <i>n</i> <sup>†</sup> |
|--------------|--------------------|--------------------|----------------|-----------------------|
| <i>ev700</i> | 28                 | 32                 | 10             | 27                    |
| <i>ev701</i> | 27                 | 33                 | 5              | 27                    |
| <i>ev721</i> | 51                 | 17                 | 15             | 30                    |
| <i>k177</i>  | 97                 | 23                 | 0              | 15                    |

\*The homozygotes of the putative null, *ev788*, are not viable.

<sup>†</sup>Number of parental animals counted.
