# Supplementary material
Source: PubMed Central journal article supplement (PMC2674254)
Supplement: dev.028472_5.pdf [file dev.028472_5.pdf]

**Table S2. Anti-morphic nature of a *mig-6* class-*s* allele**

| Genotype                                                 | % class- <i>l</i> defects |           | % class- <i>s</i> defects |           | <i>n</i> |
|----------------------------------------------------------|---------------------------|-----------|---------------------------|-----------|----------|
|                                                          | Anterior                  | Posterior | Anterior                  | Posterior |          |
| <i>mig-6 (ev701)</i>                                     | 0                         | 0         | 93                        | 88        | 120      |
| <i>dpy-11 mig-6 (ev701)/ ++</i>                          | 0                         | 0         | 0                         | 77        | 148      |
| <i>dpy-11 mig-6 (ev788)/ ++</i>                          | 0                         | 0         | 9                         | 22        | 87       |
| <i>dpy-11 mig-6 (ev788); evEx343 [pZH95 +sur-5::GFP]</i> | 2                         | 3         | 4                         | 2         | 359      |
| <i>evEx[mig-6(ev701)+sur-5::GFP]*</i>                    | 0                         | 0         | 87                        | 67        | 78       |

\*Actual genetic background is *unc-119 (e2498) III; evIs212 [pM17::GFP, pUnc119]; evEx[mig-6(ev701)+pTG96]*.
