# Supplementary material
Source: PubMed Central journal article supplement (PMC2674254)

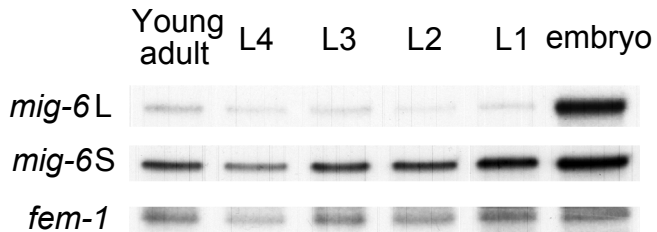

Supplement: dev.028472_1.pdf [file dev.028472_1.pdf]

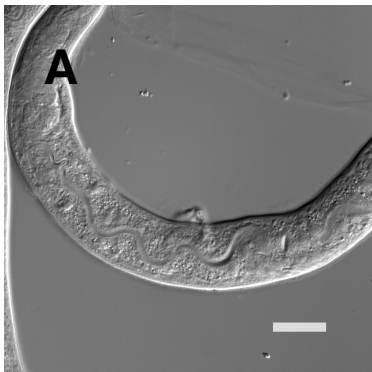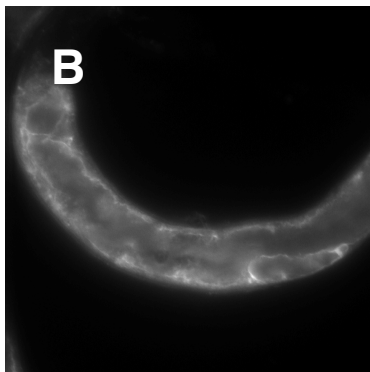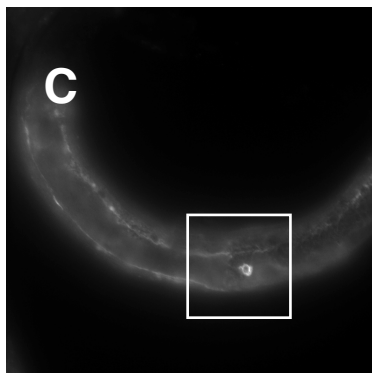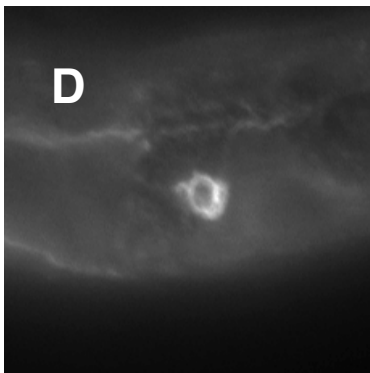

Supplement: dev.028472_2.pdf [file dev.028472_2.pdf]

kD  
130 |  
95 |  
72 |

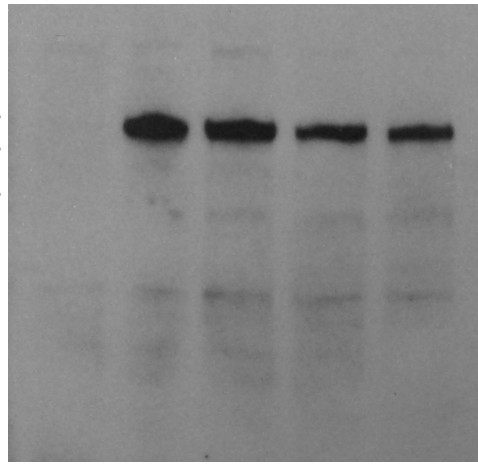

N2

evIs209

evIs209; mig-6(ev700)

evIs212

evIs212; mig-6(ev700)

Supplement: dev.028472_3.pdf [file dev.028472_3.pdf]
